# Supplementary material for: Germanium and phosphorus co-doped carbon nanotubes with high electrocatalytic activity for oxygen reduction reaction
Source: Royal Society of Chemistry journal article supplement (doi:10.1039/c5ra26675k), 2016-01-01
Supplement: c5ra26675k1.pdf [file c5ra26675k1.pdf]

## Electronic Supplementary Information for

### **Germanium and Phosphorus Co-Doped Carbon Nanotubes with High Electrocatalytic Activity for Oxygen Reduction Reaction**

Qianqian Li ‡<sup>1</sup>, Fang Yuan ‡<sup>1</sup>, Chunyun Yan<sup>1</sup>, Jianjie Zhu<sup>1</sup>, Jin Sun\*<sup>1</sup>, Yijun Wang<sup>1</sup>, Jun Ren\*<sup>2</sup> Xilin She\*<sup>1</sup>

1 School of Environmental Science and Engineering, Collaborative Innovation Centre for Marine Biomass Fibres, Materials and Textiles of Shandong Province; Qingdao University, Qingdao, P R China.

2 School of Chemical and Environmental Engineering, North University of China, Taiyuan, P R China.

E-mail: xlshe@qdu.edu.cn, sunjin@qdu.edu.cn; jun.ren@nuc.edu.cn

## Theoretical calculation details

We performed first-principles calculations based on spin-polarized DFT. The Vienna Ab initio Simulation Package (VASP 5.2) is used to solve Kohn-Sham equations with periodic boundary conditions and a plane wave basis set.<sup>1-2</sup> Electron-ion interactions were described by projector-augmented wave (PAW) potentials;<sup>3,4</sup> exchange and correlation energies were also calculated using the Perdew-Burke-Ernzerhof form of the spin-polarized generalized gradient approximation (GGA-PBE).<sup>5,6</sup> We used a kinetic energy cutoff of 500 eV for all calculations, and the convergence threshold was set to  $10^{-5}$  eV in energy and  $10^{-3}$  eV/Å in force, and cell dimensions along the z direction were 12 Å to avoid interaction between layers. The Monkhorst-Pack k-point grids ( $1 \times 1 \times 2$ ) are employed for Brillouin zone integration for all the structures, using approximately same k-point density for reciprocal cells of different sizes. In the present work, we have taken a (8, 0) zigzag nanotube having length twice of its lattice constant for the work function of Ge-P-CNTs with different doping-geometries. It has total 64 C atoms and is placed in a  $15 \text{ \AA} \times 15 \text{ \AA} \times 8.572 \text{ \AA}$  tetragonal supercell. The equilibrium configurations were determined by relaxation of all atoms in the supercell.

The stability of various doping models is evaluated by calculating their formation energies ( $E_f$ ) as follows,

$$E_f = E_D - E_G + \Delta n_C \mu_C - \Delta n_P \mu_P - \Delta n_{Ge} \mu_{Ge} \quad (1)$$

where  $E_D$  and  $E_G$  are the energies of doped and pristine CNT (8, 0), respectively,  $\mu_i$  is the chemical potential of atomic species  $i$  ( $i = C, P$  and  $Ge$ ), and  $\Delta n_i$  is the difference of atomic species  $i$  in the doped and pristine CNT (8,0). Here  $\mu_C$ ,  $\mu_P$  and  $\mu_{Ge}$  are referred to the energy of the C atom in pristine CNT (8, 0), the energy of the P atom coming from red phosphorus unit cell, and the energy of the Ge atom in bulk, respectively.

According to our computation results shown in Table S1, single P doped CNT (8, 0) is the most stable configuration and its formation energy is lower than the other Ge-P-CNTs system in pristine CNT. The work function of CNT (8, 0) in our work has been calculated to be 4.46 eV, which is closed to the previous study.<sup>7</sup>

Table S1. The calculated formation energies (in eV) of all doped CNT(8, 0) configurations.

|                 | P-CNT | Ge-CNT | P-Ge-CNT | 2P-Ge-CNT | 3P-Ge-CNT | 4P-Ge-CNT | Pristine CNT |
|-----------------|-------|--------|----------|-----------|-----------|-----------|--------------|
| $E_f$ /eV       | 1.75  | 3.86   | 4.31     | 4.43      | 4.95      | 5.81      | —            |
| Workfunction/eV | 4.48  | 4.72   | 4.77     | 4.39      | 4.28      | 4.24      | 4.46         |

## References

- 1 G. Kresse and J. Hafner, *Physical Review B*, 1993, **47**, 558.
- 2 G. Kresse and J. Furthmuller, *Physical Review B*, 1996, **54**, 11169-11186.
- 3 P.E. Blochl, *Physical Review B*, 1994, **50**, 17953-17979.
- 4 G. Kresse and D. Joubert, *Physical Review B*, 1999, **59**, 1758-1775.
- 5 J.P. Perdew, K. Burke and M. Ernzerhof, *Physical Review Letters*, 1996, **77**, 3865-3868.
- 6 J. P. Perdew, K. Burke and M. Ernzerhof, *Physical Review Letters*, 1997, **78**, 1396-1401.
- 7 W. S. Su, T. C. Leung and C. T. Chan, *Physical Review B*, 2007, **76**, 235413(1)-(8).

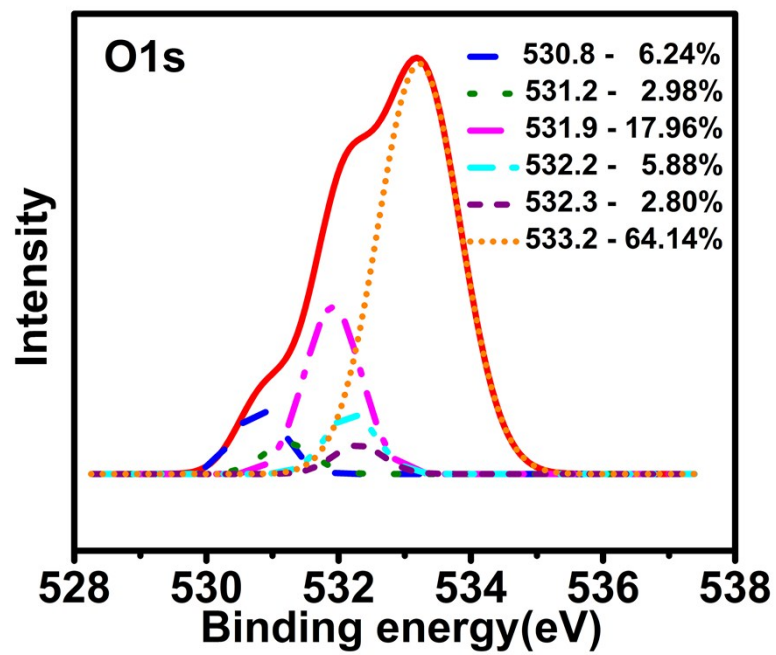

Fig. S1 the deconvoluted XPS O1s spectra for Ge-P-CNTs-2.

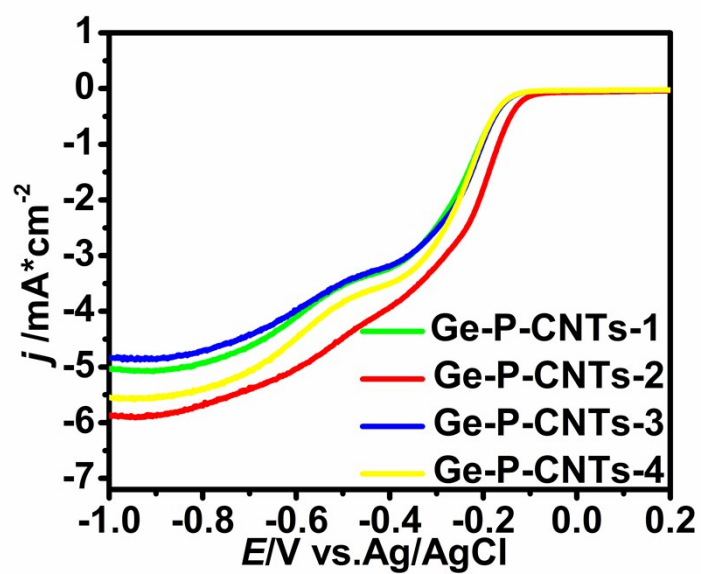

Fig. S2 LSV curves for various materials in O<sub>2</sub>-saturated 0.1 M solution of KOH with a rotation rate of 1600 rpm.

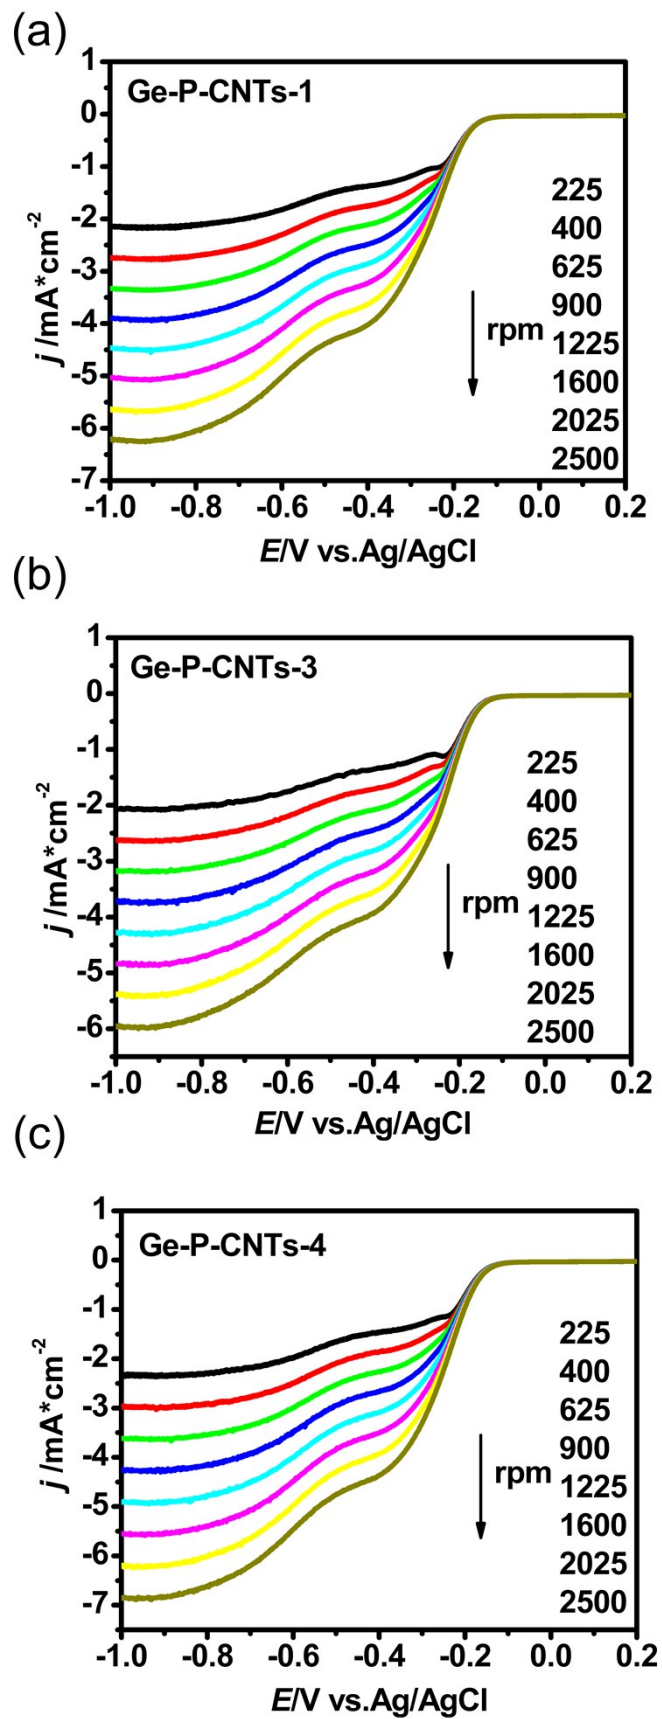

Fig. S3 LSV curves for the Ge-P-CNTs-1, Ge-P-CNTs-3 and Ge-P-CNTs-4 at various rotating speeds.

Table S2 The electron-transfer numbers obtained from K-L plots at different potentials for Ge-P-CNTs-1, Ge-P-CNTs-2, Ge-P-CNTs-3, Ge-P-CNTs-4.

|                    | <b>-0.30 V</b> | <b>-0.40 V</b> | <b>-0.475 V</b> | <b>-0.50 V</b> | <b>-0.70 V</b> | <b>-1.0 V</b> |
|--------------------|----------------|----------------|-----------------|----------------|----------------|---------------|
| <b>Ge-P-CNTs-1</b> | 2.6            | 2.8            | 3.0             | 3.2            | 3.8            | 3.9           |
| <b>Ge-P-CNTs-2</b> | 3.1            | 3.5            | 3.8             | 3.9            | 4.0            | 4.0           |
| <b>Ge-P-CNTs-3</b> | 2.6            | 2.8            | 3.1             | 3.1            | 3.6            | 3.8           |
| <b>Ge-P-CNTs-4</b> | 2.8            | 2.9            | 3.2             | 3.4            | 3.9            | 3.9           |
